# Supplementary material for: Structure and magnetism of a verdazyl radical clathrate hydrate. Strong intermolecular magnetic interactions derived from π-stacking within ice-like channels
Source: Royal Society of Chemistry journal article supplement (doi:10.1039/b908520c), 2009-01-01
Supplement: b908520c.pdf [file b908520c.pdf]

## Structure and magnetism of a verdazyl radical clathrate hydrate. Strong intermolecular magnetic interactions derived from $\pi$ -stacking within ice-like channels

Joe B. Gilroy,<sup>a</sup> Martin T. Lemaire,<sup>a,b</sup> Brian O. Patrick,<sup>c</sup> and Robin G. Hicks<sup>a\*</sup>

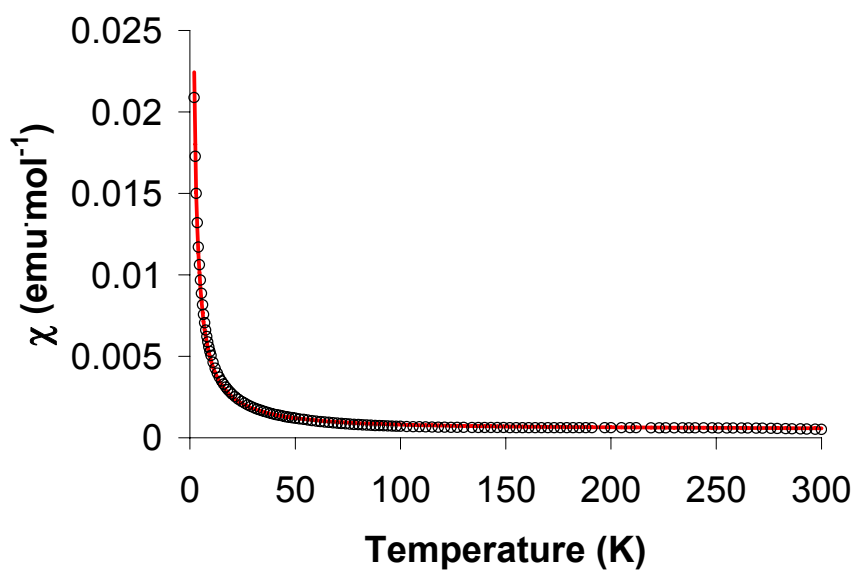

**Figure S1.** Temperature dependence of the magnetic susceptibility of **3** (Independent sample). Data ( $\circ$ ), fit (red line). Fitting ( $g = 2.00$  fixed) yields  $\rho = 0.88$ ,  $J = -306 \text{ cm}^{-1} \pm 14 \text{ cm}^{-1}$ ,  $R = 0.05$ .
